# Supplementary material for: Oocyte-dependent activation of MTOR in cumulus cells controls the development and survival of cumulus-oocyte complexes
Source: Oxford University Press journal article supplement (doi:10.1242/jcs.182642), 2016-01-01
Supplement: jcs182642supp.pdf [file jcs182642supp.pdf]

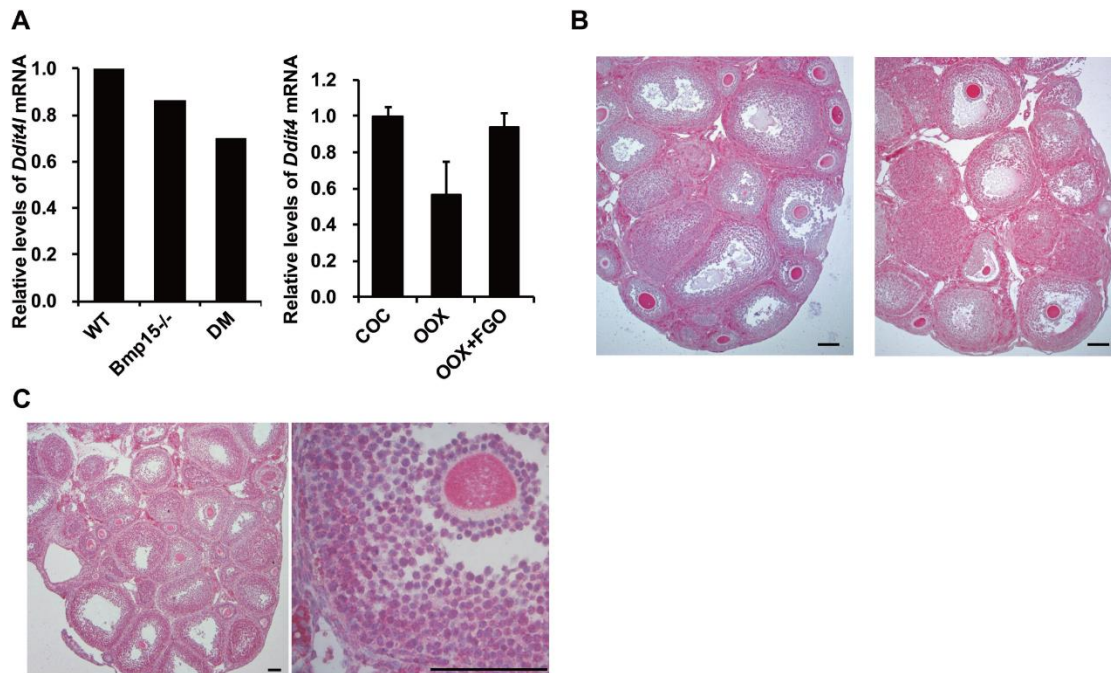

**Fig. S1.** A. Relative quantification of *Ddit4* mRNA expressed by WT-, *Bmp15*<sup>-/-</sup>, and DM- cumulus cells by microarray (left graph), and real-time RT-PCR analysis of changes of *Ddit4* mRNA in cumulus cells of normal WT- COCs, OOXs, and OOX co-cultured with WT- fully grown oocytes 20 h after incubation in vitro (right panel); B. Expression of DDIT4L protein in WT- and DM- ovaries as revealed by IHC; C. IHC staining of DDIT4 protein expression in normal WT- ovary.

Scale bars indicate 100 μm.

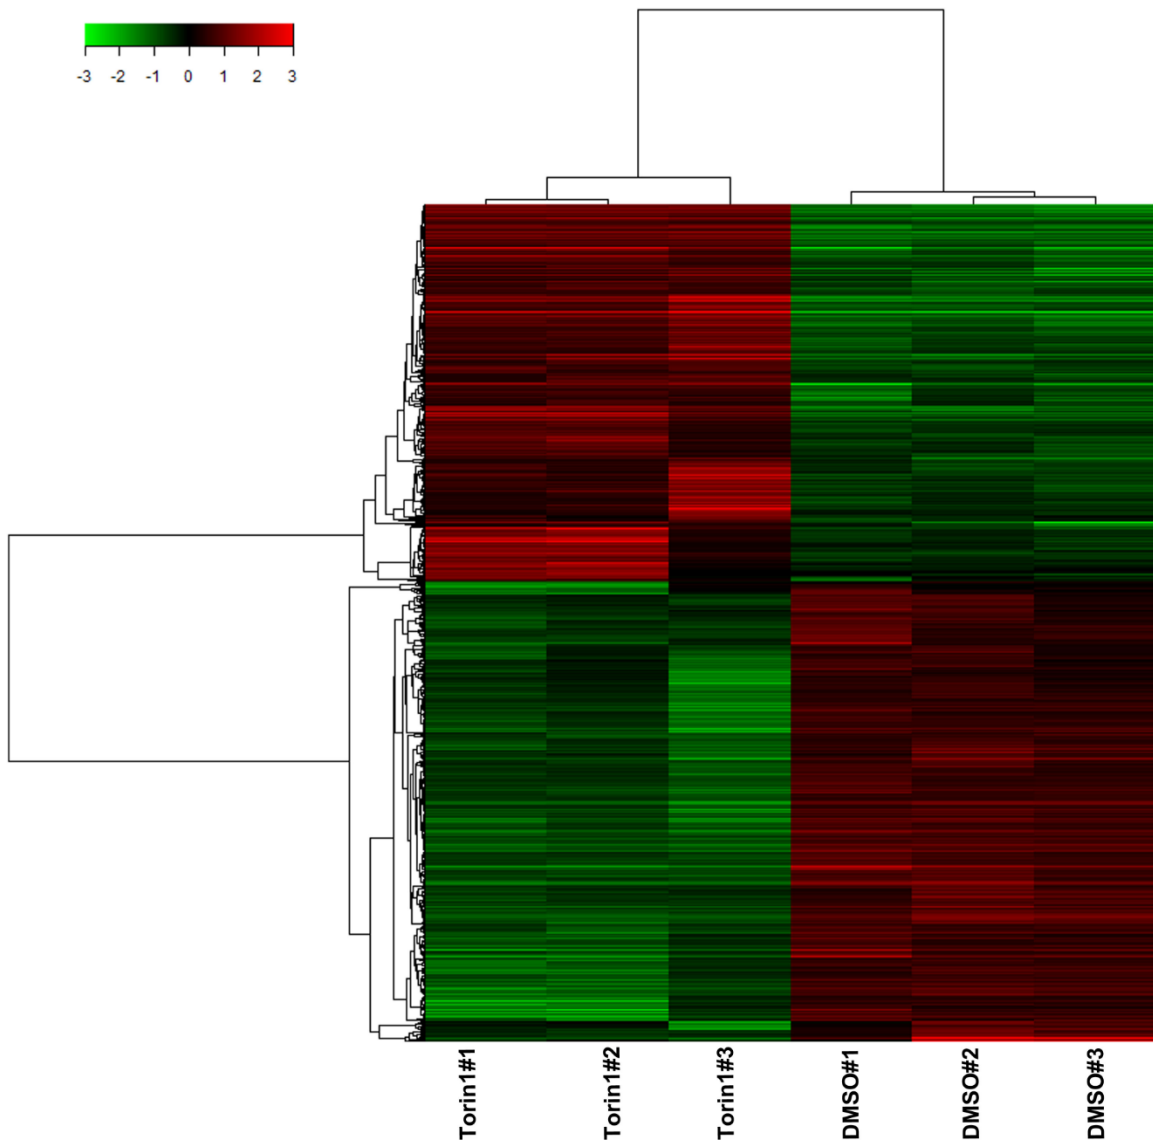

**Fig. S2.** Unsupervised hierarchical clustering analysis of the transcripts that were changed in COCs after Torin1 treatment as revealed by microarray analysis.

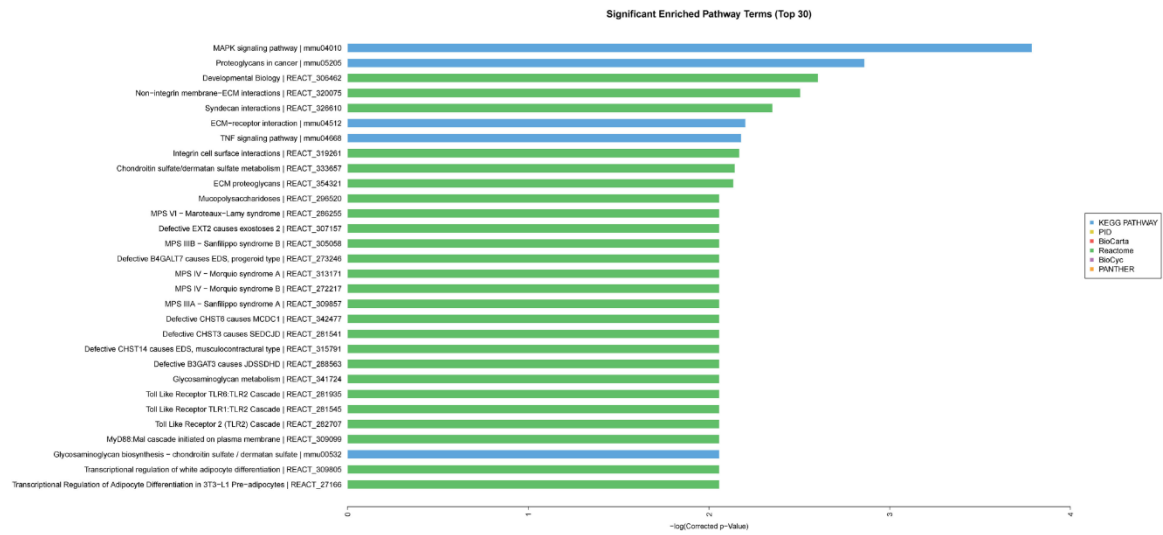

Fig. S3. Pathways that were associated with significantly upregulated transcripts.

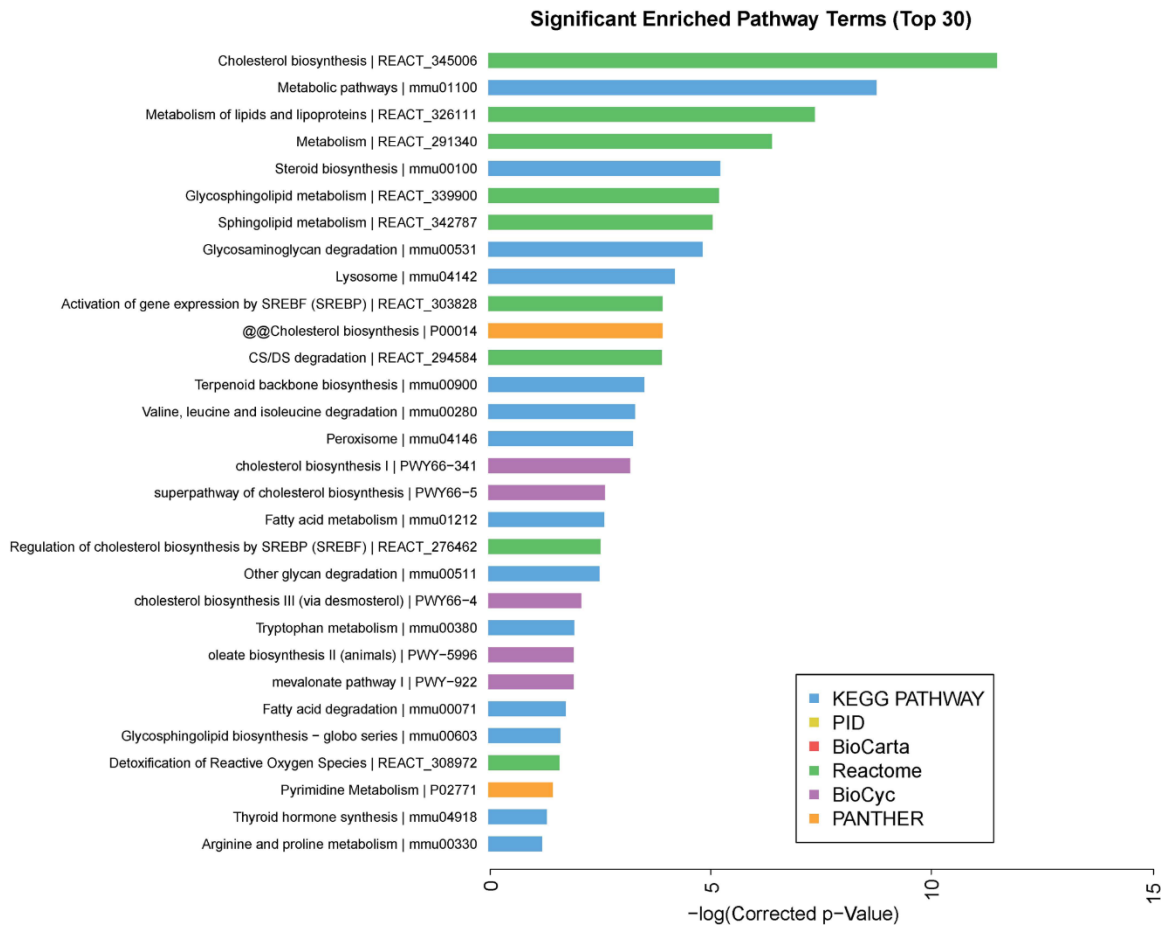

**Fig. S4. Pathways that were associated significantly with the downregulated transcripts**

**Table S1. Primers used for real-time PCR**

| <b>Gene Symbol</b> | <b>Forward Primer 5' to 3'</b> | <b>Reverse Primer 5' to 3'</b> |
|--------------------|--------------------------------|--------------------------------|
| <i>Alcam</i>       | CCTTGGATGGTACACTGTCAACTC       | TAGAAGATCGGAATGCAATAAATACTG    |
| <i>Aldoc</i>       | GAACAAAAGGAGATGTGGGAACTG       | AGCAGGAGAAGCAGCCTTTGG          |
| <i>Ar</i>          | GCTGTCACTACGGAGCTCTCACT        | CAATCGTTTCTGCTGGCACAT          |
| <i>Areg</i>        | TCCAAGATTGCAGTAGTAGCTGTCA      | TATCGTTTCCAAAGGTGCACTGT        |
| <i>Btc</i>         | AACTGCACAGGTACCACCCCTAGA       | ACAGATGCAGGAGGGAGTTTGC         |
| <i>Cyp51</i>       | GGCAAGACCTTCACTTACCTTCTG       | GACCGTAGACTTCTTCTGCATTTCAG     |
| <i>Dhcr24</i>      | TCGGAAAGTACAAGAAGACCCATAA      | ACCAAGGGCTCCACTCGAA            |
| <i>Ebp</i>         | CAACAGCCCTTCCGCTTTG            | CCCATGCTGGAGTCCTTCGT           |
| <i>Egfr</i>        | GTGGAGGGACATCGTCCAAA           | ATTGGGACAGCTTGGATCACAT         |
| <i>Ereg</i>        | CCATCATGCATCCCAGGAGAA          | TAGCCGTCCATGTCAGAACTACACT      |
| <i>Fdps</i>        | TGTGTAGAACTGCTCCAGGCTTT        | AAGCCTATGCCTGGCTTCTGA          |
| <i>Fgf5</i>        | GGGATTGTAGGAATACGAGGAGTTT      | CCCTGAACTTACAGTCATCCGTAAA      |
| <i>Fshr</i>        | TCATTGCTCTAACAGGGTCTTCCT       | TGGTGAGCACAAATCTCAGTTCA        |
| <i>Gpr83</i>       | GTCTCAGCACTGACTCTGACAGCTA      | TATATATGACACCCTTGGTGATGGA      |
| <i>Has2</i>        | CGAGTCTATGAGCAGGAGCTG          | GTGATTCCGAGGAGGAGAGACA         |
| <i>Hmgcs2</i>      | CCTACGGCTCAGGCTTAGCA           | CAGATCTGACACACTAGACACCAGTTT    |
| <i>Hpgd</i>        | GACCTATCTTGGTTTGGATTACATGA     | CGAAGCACATAAACAGGTTGCT         |
| <i>Ifi202b</i>     | CCCCTTCCAGTGATTCATCTG          | GCACCTTTGCTAATGTTCTTTTTTG      |
| <i>Il23a</i>       | CCACAAGGACTCAAGGACAACA         | GCTCCCCTTTGAAGATGTCAGA         |
| <i>Lss</i>         | GTGATGCAGGCACTGAAGCA           | GCAGAAGTCCAGGCCTTGATT          |
| <i>Mvd</i>         | TCTACCCCTCAGCCTCAGCTATAA       | AGGGTATAGGCTAGGCAGGCATA        |
| <i>Mvk</i>         | ATCCATGGGAACCCTTCTGG           | GACGGGAGGCTCTTCAAGGA           |
| <i>Npr2</i>        | GCTGACCCGGCAAGTTCTGT           | ACAATACTCGGTGACAATGCAGAT       |
| <i>Pmvk</i>        | AGCAGAGTCGACAGCAACGG           | TCTCAATGACCCAGTCAAAGTTCC       |
| <i>Ptgs2</i>       | CCCTTCTCCCGTAGCAGAT            | TGAACTCTCTCCGTAGAAGAACCTTT     |
| <i>Ptx3</i>        | TTGCTGAGACCTCGGATGAC           | GCGAGTTCTCCAGCATGATGA          |
| <i>Rpl19</i>       | TCAGGCTACAGAAGAGGCTTGC         | ATCAGCCCATCCTTGATCAGC          |
| <i>Runx2</i>       | CACCGACAGTCCCAACTTCCT          | ACGGTAACCACAGTCCCATCTG         |
| <i>Slc38a3</i>     | CATCATGGGCAGTGGAATTCT          | ACAGGGCGACCGCTGTAA             |
| <i>Tgfr3</i>       | CCAAGGGAGGTTTACATCCTAA         | GAGTGTGCACGGAGGCAATG           |
| <i>Tm7sf2</i>      | AGCTTGGGTACCATTACCTACAG        | GGCCCCTCGGAACATGTAGT           |
| <i>Tnfr1</i>       | ATACAAGCTCACCTACGCCGAA         | ATCCATCCAGCAGCACAGACAT         |
